# Supplementary material for: Racemization in cataractous lens from diabetic and aging individuals: analysis of Asp 58 residue in αA-crystallin
Source: publisher site journal article supplement (doi:10.18632/aging.203086), 2021-06-07
Supplement: Supplementary file [file aging-v13i11-203086-supplementary-material-SD1.pdf]

SUPPLEMENTARY FIGURES

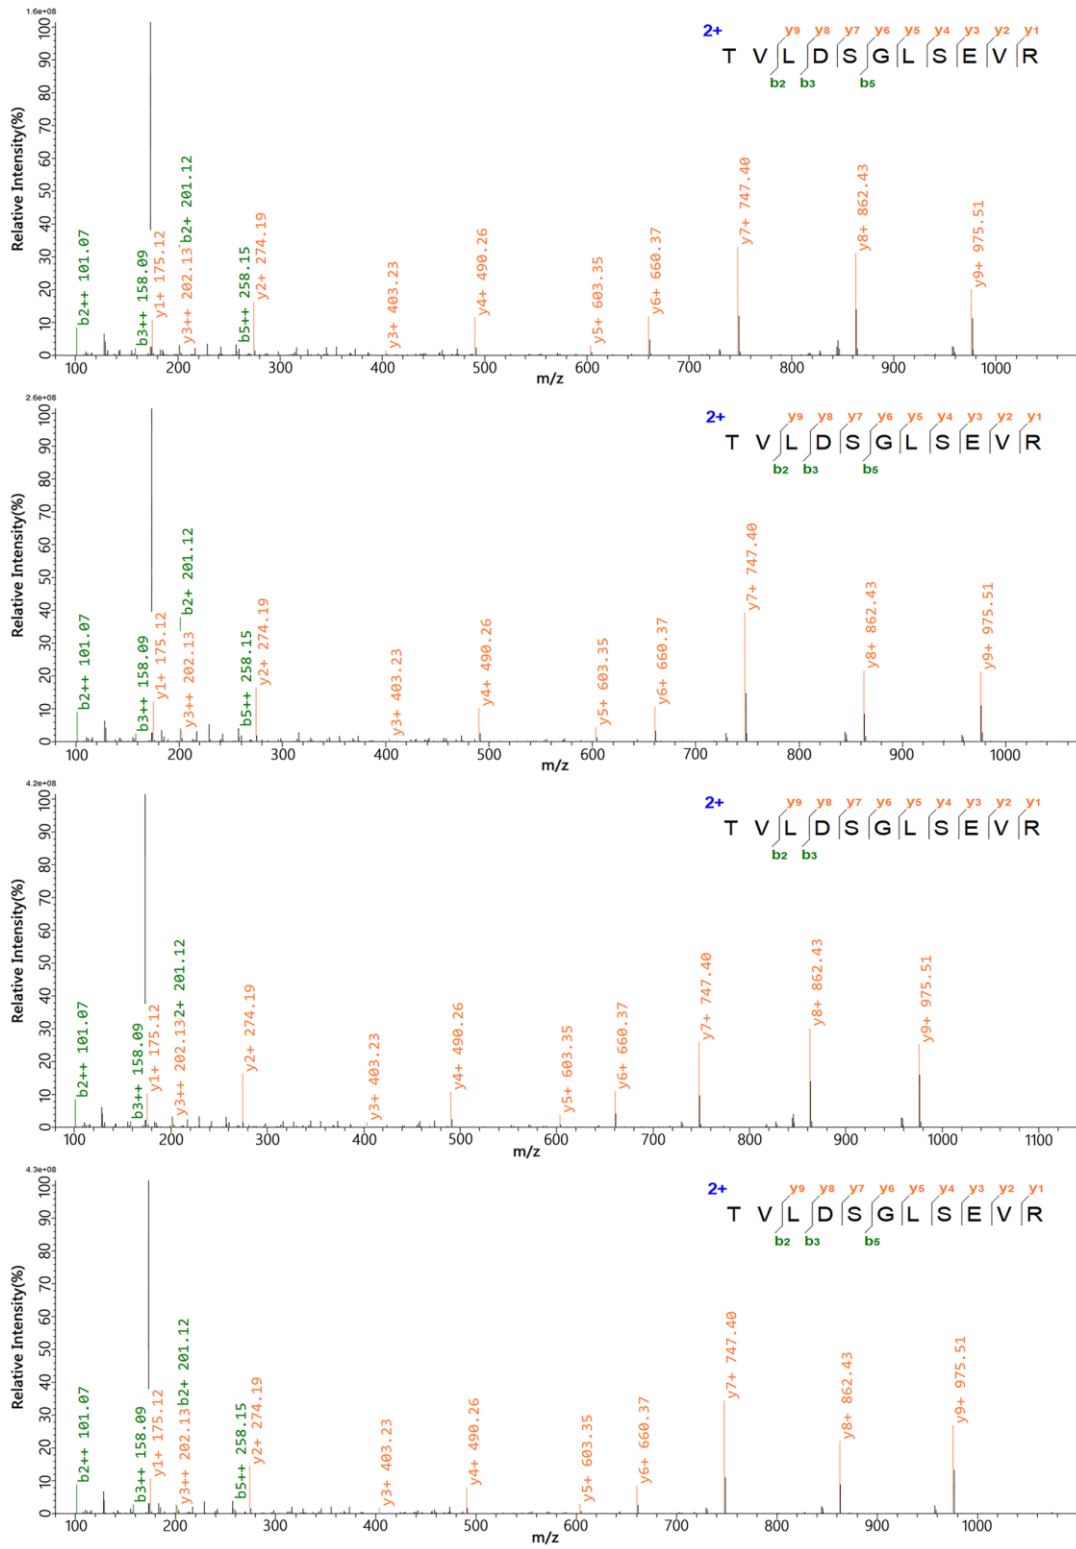

Supplementary Figure 1. The MS/MS spectra of Asp isoforms containing peptide from ARC patients.

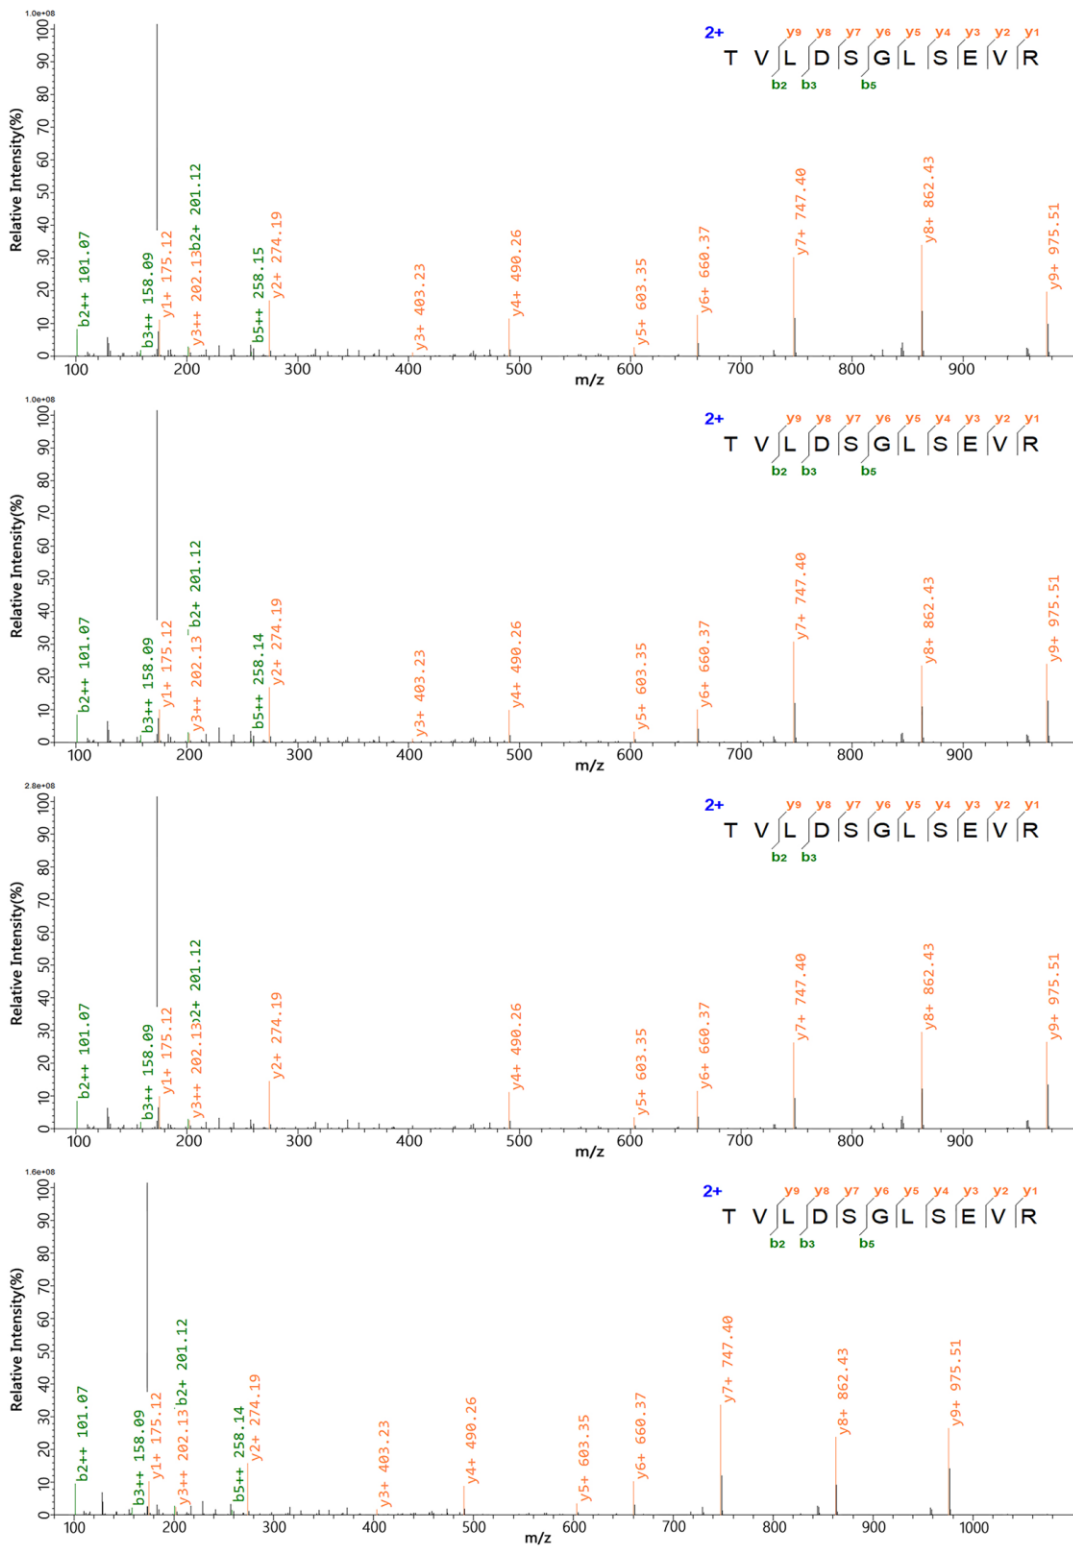

Supplementary Figure 2. The MS/MS spectra of Asp isoforms containing peptide from DC patients.

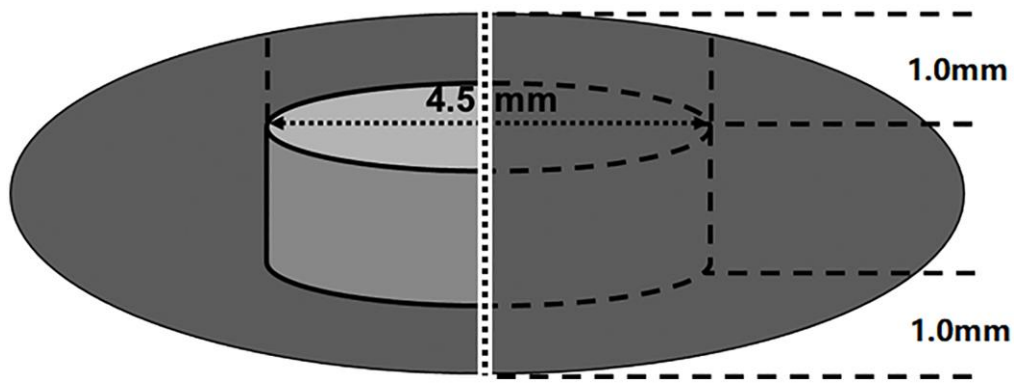

Supplementary Figure 3. Dissection of human lenses.
